# Supplementary material for: The Prevalence and Characterization of Extended-Spectrum β-Lactamase- and Carbapenemase-Producing Bacteria from Hospital Sewage, Treated Effluents and Receiving Rivers
Source: PubMed Central journal article supplement (PMC7068339; doi:10.3390/ijerph17041183), 2020-02-13
Supplement: ijerph-17-01183-s001.pdf [file ijerph-17-01183-s001.pdf]

Table S1 Primers used in this study.

| Primer name                            | Sequence (5'-3')          | Reference                 |
|----------------------------------------|---------------------------|---------------------------|
| 27F                                    | AGAGTTTGATCCTGGCTCAG      | (Lane, 1991)              |
| 1492R                                  | ACGGCTACCTTGTTACGACTT     |                           |
| <i>bla</i> <sub>CTX-M-F</sub>          | CGATGTGCAGTACCAGTAA       | (Batchelor et al., 2005)  |
| <i>bla</i> <sub>CTX-M-R</sub>          | TTAGTGACCAGAATCAGCGG      |                           |
| <i>bla</i> <sub>CTX-M-1 group -F</sub> | CAGCGCTTTTGCCGTCTAAG      | (Yu et al., 2007)         |
| <i>bla</i> <sub>CTX-M-1 group -R</sub> | GGCCCATGGTTAAAAAATCACTGC  |                           |
| <i>bla</i> <sub>CTX-M-2 group -F</sub> | CTCAGAGCATTCCCGCTCA       | (Yu et al., 2007)         |
| <i>bla</i> <sub>CTX-M-2 group -R</sub> | CCGCCGCAGCCAGAATATCC      |                           |
| <i>bla</i> <sub>CTX-M-8 group -F</sub> | ACTTCAGCCACACGGATTCA      | (Yu et al., 2007)         |
| <i>bla</i> <sub>CTX-M-8 group -R</sub> | CGAGTACGTACGACGACTT       |                           |
| <i>bla</i> <sub>CTX-M-9 group -F</sub> | GTTACAGCCCTTCGGCGATGATTC  | (Yu et al., 2007)         |
| <i>bla</i> <sub>CTX-M-9 group -R</sub> | GCGCATGGTGACAAAGAGAGTGCAA |                           |
| <i>bla</i> <sub>VIM-F</sub>            | GATGGTGTGGTTCGCATA        | (Ellington et al., 2007)  |
| <i>bla</i> <sub>VIM-R</sub>            | CGAATGCGCAGCACCAG         |                           |
| <i>bla</i> <sub>KPC-F (full)</sub>     | CGCTACACCTAGCTCCACCTTC    | This study                |
| <i>bla</i> <sub>KPC-R (full)</sub>     | CGGTGGTGGGCCAATAGATG      |                           |
| <i>bla</i> <sub>NDM-F (full)</sub>     | ATTTACTAGGCCTCGCATTTGC    | This study                |
| <i>bla</i> <sub>NDM-R (full)</sub>     | GCCTCTGTACATCGAAATCG      |                           |
| <i>bla</i> <sub>IMP-F</sub>            | GGAATAGAGTGGCTTAAYTCTC    | (Ellington et al., 2007)  |
| <i>bla</i> <sub>IMP-R</sub>            | CCAAACYACTASGTTATCT       |                           |
| <i>bla</i> <sub>OXA-48-F</sub>         | TTGGTGGCATCGATTATCGG      | (Szekely et al., 2013)    |
| <i>bla</i> <sub>OXA-48-R</sub>         | GAGCACTTCTTTTGTGATGGC     |                           |
| <i>bla</i> <sub>OXA-58-F</sub>         | AAGTATTGGGGCTTGTGCTG      | (Asadollahi et al., 2012) |
| <i>bla</i> <sub>OXA-58-R</sub>         | CCCCTCTGCGCTCTACATAC      |                           |

## References

- Asadollahi, P, Akbari, M, Soroush, S, Taherikalani, M, Asadollahi, K, Sayehmiri, K, Maleki, A, Maleki, M H, Karimi, P, Emaneini, M, 2012. Antimicrobial resistance patterns and their encoding genes among *Acinetobacter baumannii* strains isolated from burned patients. *Burns* 38:1198-1203.
- Batchelor, M, Hopkins, K, Threlfall, E J, Clifton-Hadley, F A, Stallwood, A D, Davies, R H, Liebana, E, 2005. *bla*(CTX-M) genes in clinical *Salmonella* isolates recovered from humans in England and Wales from 1992 to 2003. *Antimicrob Agents Chemother* 49:1319-1322.
- Ellington, M J, Kistler, J, Livermore, D M, Woodford, N, 2007. Multiplex PCR for rapid detection of genes encoding acquired metallo-beta-lactamases. *J Antimicrob Chemother* 59:321-322.
- Lane, D J, 1991. 16S/23S rRNA sequencing. *Nucleic acid techniques in bacterial systematics*:115-175.
- Szekely, E, Damjanova, I, Janvari, L, Vas, K E, Molnar, S, Bilca, D V, Lorinczi, L K, Toth, A, 2013. First description of *bla*(NDM-1), *bla*(OXA-48), *bla*(OXA-181) producing *Enterobacteriaceae* strains in Romania. *Int J Med Microbiol* 303:697-700.
- Yu, Y, Ji, S, Chen, Y, Zhou, W, Wei, Z, Li, L, Ma, Y, 2007. Resistance of strains producing extended-spectrum beta-lactamases and genotype distribution in China. *The Journal of infection*

54:53-57.
